# Supplementary material
Source: Springer Nature journal article supplement (https://www.springermedizin.de/resource/supplementary/12877_2009_177_MOESM3_ESM.pdf/9441336)

# Frailty Index

■ Men

● Women

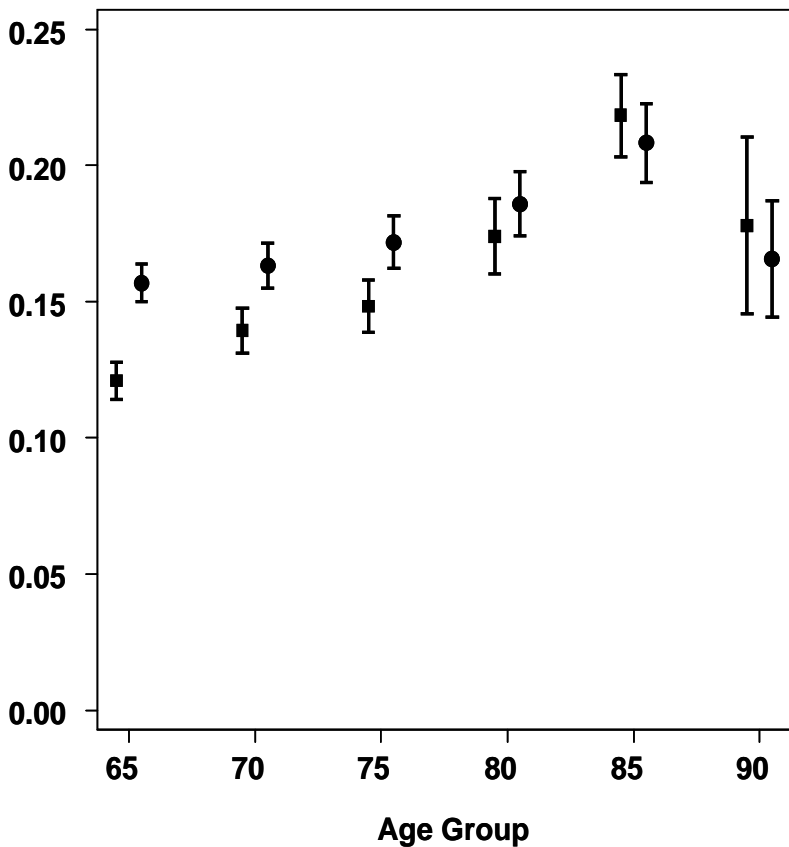

Supplement: MOESM3 [file 9441336]
